# Supplementary material
Source: HighWire-hosted journal article supplement (https://bmjopen.bmj.com/content/8/5/e020330)
Supplement: inline-supplementary-material-1 [file inline-supplementary-material-1.pdf]

## APPENDICES

**Appendix 1:** Table displaying the PRISMA-P 2015 Checklist

### PRISMA-P 2015 Checklist

This checklist has been adapted for use with protocol submissions to *Systematic Reviews* from Table 3 in Moher D et al: Preferred reporting items for systematic review and meta-analysis protocols (PRISMA-P) 2015 statement. *Systematic Reviews* 2015 4:1

| Section/topic              | #  | Checklist item                                                                                                                                                                                  | Information reported                |                                     | Page number(s) |
|----------------------------|----|-------------------------------------------------------------------------------------------------------------------------------------------------------------------------------------------------|-------------------------------------|-------------------------------------|----------------|
|                            |    |                                                                                                                                                                                                 | Yes                                 | No                                  |                |
| ADMINISTRATIVE INFORMATION |    |                                                                                                                                                                                                 |                                     |                                     |                |
| Title                      |    |                                                                                                                                                                                                 |                                     |                                     |                |
| Identification             | 1a | Identify the report as a protocol of a systematic review                                                                                                                                        | <input checked="" type="checkbox"/> | <input type="checkbox"/>            | 1              |
| Update                     | 1b | If the protocol is for an update of a previous systematic review, identify as such                                                                                                              | <input type="checkbox"/>            | <input checked="" type="checkbox"/> |                |
| Registration               | 2  | If registered, provide the name of the registry (e.g., PROSPERO) and registration number in the Abstract                                                                                        | <input type="checkbox"/>            | <input checked="" type="checkbox"/> |                |
| Authors                    |    |                                                                                                                                                                                                 |                                     |                                     |                |
| Contact                    | 3a | Provide name, institutional affiliation, and e-mail address of all protocol authors; provide physical mailing address of corresponding author                                                   | <input checked="" type="checkbox"/> | <input type="checkbox"/>            | 1              |
| Contributions              | 3b | Describe contributions of protocol authors and identify the guarantor of the review                                                                                                             | <input checked="" type="checkbox"/> | <input type="checkbox"/>            | 10             |
| Amendments                 | 4  | If the protocol represents an amendment of a previously completed or published protocol, identify as such and list changes; otherwise, state plan for documenting important protocol amendments | <input type="checkbox"/>            | <input checked="" type="checkbox"/> |                |
| Support                    |    |                                                                                                                                                                                                 |                                     |                                     |                |
| Sources                    | 5a | Indicate sources of financial or other support for the review                                                                                                                                   | <input checked="" type="checkbox"/> | <input type="checkbox"/>            | 10             |
| Sponsor                    | 5b | Provide name for the review funder and/or sponsor                                                                                                                                               | <input checked="" type="checkbox"/> | <input type="checkbox"/>            | 10             |

| Section/topic               | #   | Checklist item                                                                                                                                                                                                            | Information reported                |                          | Page number(s) |
|-----------------------------|-----|---------------------------------------------------------------------------------------------------------------------------------------------------------------------------------------------------------------------------|-------------------------------------|--------------------------|----------------|
|                             |     |                                                                                                                                                                                                                           | Yes                                 | No                       |                |
| Role of sponsor/funder      | 5c  | Describe roles of funder(s), sponsor(s), and/or institution(s), if any, in developing the protocol                                                                                                                        | <input checked="" type="checkbox"/> | <input type="checkbox"/> | 10             |
| <b>INTRODUCTION</b>         |     |                                                                                                                                                                                                                           |                                     |                          |                |
| <b>Rationale</b>            | 6   | Describe the rationale for the review in the context of what is already known                                                                                                                                             | <input checked="" type="checkbox"/> | <input type="checkbox"/> | 3              |
| <b>Objectives</b>           | 7   | Provide an explicit statement of the question(s) the review will address with reference to participants, interventions, comparators, and outcomes (PICO)                                                                  | <input checked="" type="checkbox"/> | <input type="checkbox"/> | 6, 7           |
| <b>METHODS</b>              |     |                                                                                                                                                                                                                           |                                     |                          |                |
| <b>Eligibility criteria</b> | 8   | Specify the study characteristics (e.g., PICO, study design, setting, time frame) and report characteristics (e.g., years considered, language, publication status) to be used as criteria for eligibility for the review | <input checked="" type="checkbox"/> | <input type="checkbox"/> | 7, 8           |
| <b>Information sources</b>  | 9   | Describe all intended information sources (e.g., electronic databases, contact with study authors, trial registers, or other grey literature sources) with planned dates of coverage                                      | <input checked="" type="checkbox"/> | <input type="checkbox"/> | 6              |
| <b>Search strategy</b>      | 10  | Present draft of search strategy to be used for at least one electronic database, including planned limits, such that it could be repeated                                                                                | <input checked="" type="checkbox"/> | <input type="checkbox"/> | 17, 18, 19     |
| <b>STUDY RECORDS</b>        |     |                                                                                                                                                                                                                           |                                     |                          |                |
| Data management             | 11a | Describe the mechanism(s) that will be used to manage records and data throughout the review                                                                                                                              | <input checked="" type="checkbox"/> | <input type="checkbox"/> | 8              |
| Selection process           | 11b | State the process that will be used for selecting studies (e.g., two independent reviewers) through each phase of the review (i.e., screening, eligibility, and inclusion in meta-analysis)                               | <input checked="" type="checkbox"/> | <input type="checkbox"/> | 8              |
| Data collection process     | 11c | Describe planned method of extracting data from reports (e.g., piloting forms, done independently, in duplicate), any processes for obtaining and confirming data from investigators                                      | <input checked="" type="checkbox"/> | <input type="checkbox"/> | 8              |
| <b>Data items</b>           | 12  | List and define all variables for which data will be sought (e.g., PICO items, funding sources), any pre-planned data assumptions and simplifications                                                                     | <input checked="" type="checkbox"/> | <input type="checkbox"/> | 8              |

| Section/topic                             | #   | Checklist item                                                                                                                                                                                                                              | Information reported                |                                     | Page number(s) |
|-------------------------------------------|-----|---------------------------------------------------------------------------------------------------------------------------------------------------------------------------------------------------------------------------------------------|-------------------------------------|-------------------------------------|----------------|
|                                           |     |                                                                                                                                                                                                                                             | Yes                                 | No                                  |                |
| <b>Outcomes and prioritization</b>        | 13  | List and define all outcomes for which data will be sought, including prioritization of main and additional outcomes, with rationale                                                                                                        | <input checked="" type="checkbox"/> | <input type="checkbox"/>            | 8              |
| <b>Risk of bias in individual studies</b> | 14  | Describe anticipated methods for assessing risk of bias of individual studies, including whether this will be done at the outcome or study level, or both; state how this information will be used in data synthesis                        | <input checked="" type="checkbox"/> | <input type="checkbox"/>            | 7              |
| <b>DATA</b>                               |     |                                                                                                                                                                                                                                             |                                     |                                     |                |
| <b>Synthesis</b>                          | 15a | Describe criteria under which study data will be quantitatively synthesized                                                                                                                                                                 | <input type="checkbox"/>            | <input checked="" type="checkbox"/> |                |
|                                           | 15b | If data are appropriate for quantitative synthesis, describe planned summary measures, methods of handling data, and methods of combining data from studies, including any planned exploration of consistency (e.g., $I^2$ , Kendall's tau) | <input type="checkbox"/>            | <input checked="" type="checkbox"/> |                |
|                                           | 15c | Describe any proposed additional analyses (e.g., sensitivity or subgroup analyses, meta-regression)                                                                                                                                         | <input type="checkbox"/>            | <input checked="" type="checkbox"/> |                |
|                                           | 15d | If quantitative synthesis is not appropriate, describe the type of summary planned                                                                                                                                                          | <input checked="" type="checkbox"/> | <input type="checkbox"/>            | 8              |
| <b>Meta-bias(es)</b>                      | 16  | Specify any planned assessment of meta-bias(es) (e.g., publication bias across studies, selective reporting within studies)                                                                                                                 | <input type="checkbox"/>            | <input checked="" type="checkbox"/> |                |
| <b>Confidence in cumulative evidence</b>  | 17  | Describe how the strength of the body of evidence will be assessed (e.g., GRADE)                                                                                                                                                            | <input type="checkbox"/>            | <input checked="" type="checkbox"/> |                |

**Appendix 2:** Figure Displaying the Arksey and O'Malley (2005) Methodological Framework

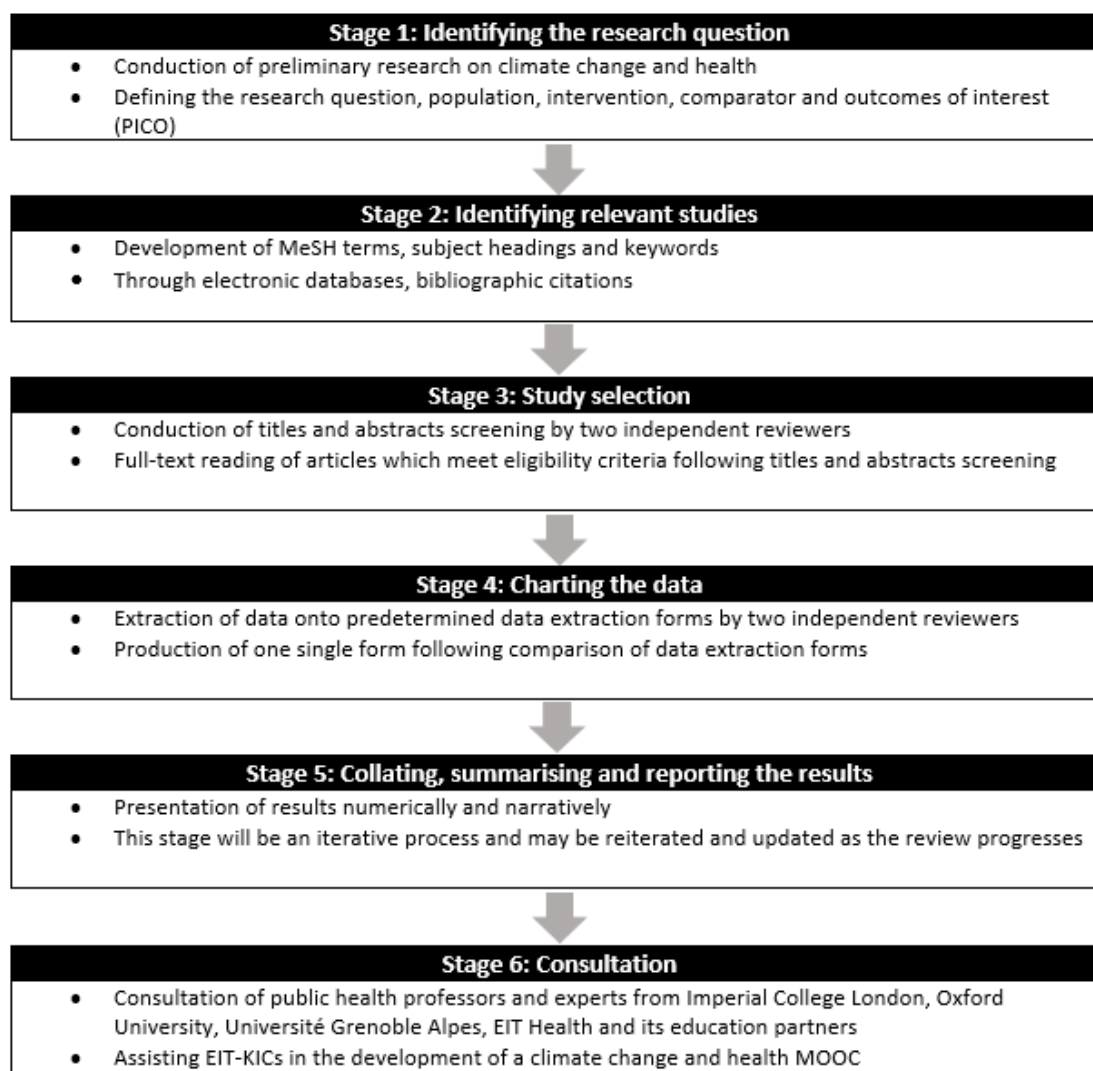

**Appendix 3:** Table Displaying the MEDLINE/PubMed Search Strategy

| Category              | MeSH                                                            | Keywords                                                                                                                                                                                                     |
|-----------------------|-----------------------------------------------------------------|--------------------------------------------------------------------------------------------------------------------------------------------------------------------------------------------------------------|
| <b>Learning</b>       | Learning exp,<br>teaching exp,<br>education exp,                | learn* OR teach* OR<br>educat* OR student*                                                                                                                                                                   |
| <b>Climate Change</b> | Climate exp, Climate<br>Change exp,<br>Greenhouse effect<br>exp | Climate change OR<br>global warming OR<br>greenhouse effect* OR<br>weather* OR<br>temperature*OR<br>COP21 OR fossil fuel*<br>OR greenhouse gas*<br>OR emission* OR<br>renewable energy OR<br>Paris Agreement |
| <b>Health</b>         | health exp                                                      | Disease* OR illness*                                                                                                                                                                                         |

**Appendix 4:** Table Displaying the Embase Search Strategy

| Category              | MeSH                                                   | Keywords                                                                                                                                                                          |
|-----------------------|--------------------------------------------------------|-----------------------------------------------------------------------------------------------------------------------------------------------------------------------------------|
| <b>Learning</b>       | Learning exp, teaching exp, education exp,             | learn* OR teach* OR educat* OR student*                                                                                                                                           |
| <b>Climate Change</b> | Climate exp, Climate Change exp, Greenhouse effect exp | Climate change OR global warming OR greenhouse effect* OR weather* OR temperature*OR COP21 OR fossil fuel* OR greenhouse gas* OR emission* OR renewable energy OR Paris Agreement |
| <b>Health</b>         | health exp                                             | Disease* OR illness*                                                                                                                                                              |

## Appendix 5: Scopus Search Strategy

Course OR learn\* OR educat\* AND climate AND health OR medicine
